# Supplementary material
Source: PubMed Central journal article supplement (PMC5936822)
Supplement: supp_RA118.001721_135033_2_supp_93409_p5h7zg.pdf [file supp_RA118.001721_135033_2_supp_93409_p5h7zg.pdf]

## Supporting Information

PcxL and HpxL are flavin-dependent, oxime-forming *N*-oxidases in phosphonocystoximic acid biosynthesis in *Streptomyces*

Michelle N. Goettge, Joel P. Cioni, Kou-San Ju, Katharina Pallitsch, William W. Metcalf

|                                                                                                                         |     |
|-------------------------------------------------------------------------------------------------------------------------|-----|
| <b>Table S1:</b> Putative phosphonocystoximate and hydroxyphosphonocystoximate gene clusters .....                      | S-2 |
| <b>Figure S1:</b> Putative phosphonocystoximate and hydroxyphosphonocystoximate gene clusters.....                      | S-3 |
| <b>Figure S2:</b> Characterization of HpxL and PcxL as FAD-dependent enzymes.....                                       | S-4 |
| <b>Figure S3:</b> $^1\text{H}$ - $^{31}\text{P}$ HMBC NMR analysis of HpxL using 2AEPn as substrate.....                | S-5 |
| <b>Figure S4:</b> $^1\text{H}$ - $^{31}\text{P}$ HMBC NMR analysis of PcxL using 2AEPn as substrate.....                | S-6 |
| <b>Figure S5:</b> $^1\text{H}$ - $^{31}\text{P}$ HMBC NMR analysis of HpxL using ( <i>S</i> )-1H2AEPn as substrate..... | S-7 |
| <b>Figure S6:</b> $^1\text{H}$ - $^{31}\text{P}$ HMBC NMR analysis of PcxL using ( <i>S</i> )-1H2AEPn as substrate..... | S-8 |

**Table S1.** Comparison of the phosphonocystoximate (Pcx) and hydroxyphosphonocystoximate (Hpx) gene clusters. Genes with the same corresponding fourth letter of the gene are homologous to one another. Percent amino acid identity between the proteins is given based on BLAST. NP = not present within the gene cluster and N/A= not applicable

| <b>Pcx Gene</b> | <b>Size (#AA)</b> | <b>Accession Number</b> | <b>Hpx Gene</b> | <b>Size (#AA)</b> | <b>Accession Number</b> | <b>%Identity</b> | <b>Putative Function / Description</b>              | <b>Pfam</b> |
|-----------------|-------------------|-------------------------|-----------------|-------------------|-------------------------|------------------|-----------------------------------------------------|-------------|
| <i>pcxA</i>     | 404               | WP_030230281.1          | <i>hpxA</i>     | 409               | WP_030990657.1          | 57%              | Helix-turn-helix domain transcriptional regulator   | PF13560     |
| <i>pcxB</i>     | 60                | WP_030230290.1          | <i>hpxB</i>     | 201               | WP_030646389.1          |                  | Hypothetical protein                                | No Match    |
| <i>pcxC</i>     | 412               | WP_051704820.1          | <i>hpxC</i>     | 414               | WP_030990660.1          | 64%              | ATP-grasp domain containing protein                 | PF13535     |
| <i>pcxD</i>     | 413               | WP_051704821.1          | <i>hpxD</i>     | 415               | WP_048910652.1          | 70%              | ATP-grasp domain containing protein                 | PF13535     |
| <i>pcxE</i>     | 484               | WP_030230301.1          | <i>hpxE</i>     | 456               | WP_030990665.1          | 58%              | Condensation domain containing protein              | PF00668     |
| <i>pcxF</i>     | 426               | WP_051704822.1          | <i>hpxF</i>     | 422               | WP_048910653.1          | 76%              | Biotin carboxylase / ATP-grasp domain               | PF13535     |
| <i>pcxG</i>     | 418               | WP_030230306.1          | <i>hpxG</i>     | 419               | WP_030990668.1          | 70%              | Major facilitator superfamily transporter           | PF07690     |
| <i>pcxH</i>     | 434               | WP_030230310.1          | <i>hpxH</i>     | 447               | WP_030646400.1          | 63%              | Peptidase                                           | PF01523     |
| <i>pcxI</i>     | 451               | WP_051704823.1          | <i>hpxI</i>     | 447               | WP_048910654.1          | 77%              | Peptidase                                           | PF01523     |
| <i>pcxJ</i>     | 213               | WP_030230320.1          | NP              | N/A               | N/A                     | N/A              | Pyridoxamine 5'-phosphate oxidase                   | PF10590     |
| <i>pcxK</i>     | 237               | WP_030230324.1          | <i>hpxK</i>     | 241               | WP_030646417.1          | 58%              | Mycothiol-dependent maleylpyruvate isomerase        | PF11716     |
| <i>pcxL</i>     | 742               | WP_051704824.1          | <i>hpxL</i>     | 750               | WP_030990682.1          | 61%              | NAD_binding_9 FAD-NAD(P)-binding                    | PF13454     |
| <i>pcxM</i>     | 363               | WP_037834389.1          | <i>hpxM</i>     | 375               | WP_030990679.1          | 66%              | Aminotransferase class-V                            | PF00266     |
| <i>pcxN</i>     | 307               | WP_030230335.1          | <i>hpxN</i>     | 290               | WP_030990678.1          | 55%              | Fosfomycin resistance kinase FomA                   | PF00696     |
| <i>pcxO</i>     | 215               | WP_030230340.1          | NP              | N/A               | N/A                     | N/A              | Thymidylate kinase                                  | PF02223     |
| <i>pcxP</i>     | 90                | WP_030230342.1          | NP              | N/A               | N/A                     | N/A              | Phosphopantetheine-binding protein                  | PF00550     |
| <i>pcxQ</i>     | 371               | WP_037834390.1          | <i>hpxQ</i>     | 395               | WP_030990677.1          | 66%              | Uncharacterized nucleotidyltransferase              | PF14907     |
| <i>pcxR</i>     | 549               | WP_030230346.1          | <i>hpxR</i>     | 563               | WP_030990676.1          | 58%              | Non-ribosomal peptide synthetase adenylation domain | PF00501     |
| <i>pcxS</i>     | 353               | WP_030230349.1          | <i>hpxS</i>     | 349               | WP_030990674.1          | 72%              | 2,3-diaminopropionate biosynthesis protein SbnB     | PF02423     |
| <i>pcxT</i>     | 322               | WP_037834298.1          | <i>hpxT</i>     | 324               | WP_030646404.1          | 67%              | 2,3-diaminopropionate biosynthesis protein SbnA     | PF00291     |
| <i>pcxU</i>     | 286               | WP_030230355.1          | <i>hpxU</i>     | 286               | WP_030646403.1          | 72%              | Phosphoenolpyruvate phosphomutase                   | PF13714     |
| NP              | N/A               | N/A                     | <i>hpxV</i>     | 322               | WP_030990672.1          | N/A              | TauD taurine catabolism dioxygenase                 | PF02668     |
| NP              | N/A               | N/A                     | <i>hpxW1</i>    | 167               | WP_030646419.1          | N/A              | Phosphonopyruvate decarboxylase alpha subunit       | PF02776     |
| NP              | N/A               | N/A                     | <i>hpxW2</i>    | 182               | WP_030646420.1          | N/A              | Phosphonopyruvate decarboxylase beta subunit        | PF02775     |
| NP              | N/A               | N/A                     | <i>hpxX</i>     | 86                | WP_030990685.1          | N/A              | Acyl carrier protein                                | PF00550     |
| NP              | N/A               | N/A                     | <i>hpxY</i>     | 337               | WP_030990687.1          | N/A              | FomB family phosphonate monophosphate kinase        | PF13481     |
| NP              | N/A               | N/A                     | <i>hpxZ</i>     | 284               | WP_030646426.1          | N/A              | EamA-like transporter family protein                | PF00892     |
| <i>orf1</i>     | 316               | WP_037834300.1          | NP              | N/A               | N/A                     | N/A              | 3-phosphoglycerate dehydrogenase                    | PF02826     |
| <i>orf2</i>     | 367               | WP_051704838.1          | NP              | N/A               | N/A                     | N/A              | L-iditol 2-dehydrogenase                            | PF08240     |
| <i>orf3</i>     | 365               | WP_030230374.1          | NP              | N/A               | N/A                     | N/A              | N-acetyl-gamma-glutamyl-phosphate reductase         | PF01118     |
| <i>orf4</i>     | 418               | WP_051704825.1          | NP              | N/A               | N/A                     | N/A              | Phosphoglycerate kinase                             | PF00162     |
| <i>orf5</i>     | 373               | WP_030230380.1          | NP              | N/A               | N/A                     | N/A              | 1,3-propanediol dehydrogenase                       | PF00465     |
| <i>orf6</i>     | 202               | WP_030230383.1          | NP              | N/A               | N/A                     | N/A              | DUF402 containing protein                           | PF04167     |

### ***Streptomyces* sp. NRRL S-481**

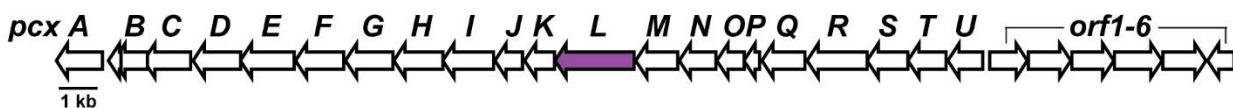

### ***Streptomyces regensis* NRRL WC-3744**

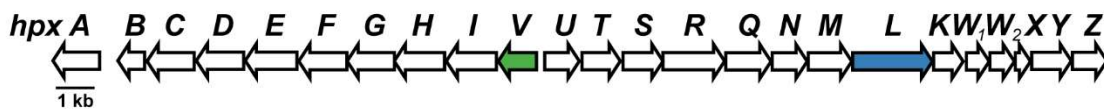

**Figure S1.** The putative biosynthetic gene clusters for phosphonocystoximate and hydroxyphosphonocystoximate, found in *Streptomyces* sp. NRRL S-481 and *Streptomyces regensis* NRRL WC-3744, respectively. Putative gene functions are shown in Table S1.

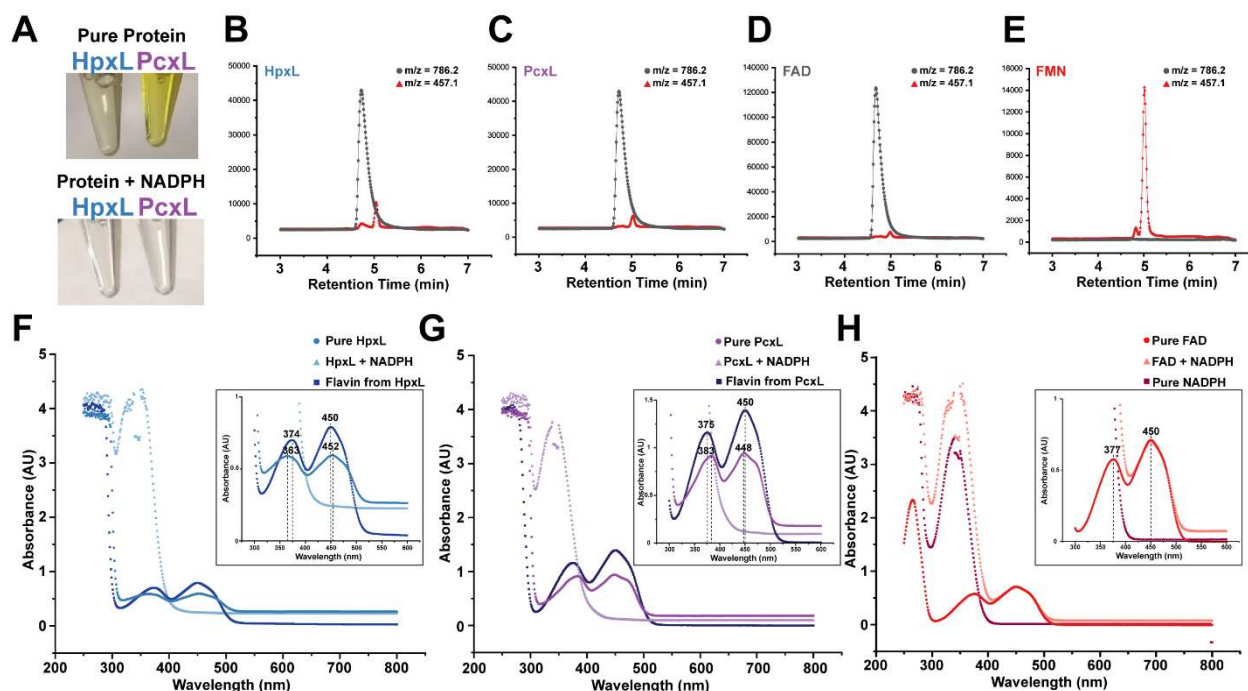

**Figure S2.** Characterization of HpxL and PcxL as FAD-dependent enzymes. (A) The top photograph is of purified 6xHis tagged *N*-oxidases after purification. The bottom photograph shows the enzyme after incubation with NADPH. (B-E) Low resolution mass spectrometry of the flavin isolated from (B) HpxL (37.1  $\mu$ M) and (C) PcxL (30.9  $\mu$ M). (D) FAD standards and (E) FMN standards were used at a concentration of 50  $\mu$ M. (F) HpxL absorption spectra of purified flavin (dark blue squares) or HpxL before (blue circles) and after (light blue triangles) incubation with NADPH. Inset shows the maximum absorption of HpxL at 363 nm and 452 nm. Purified flavin from washed HpxL shows absorption maxima at 374 nm and 450 nm. (G) PcxL absorption spectra of purified flavin (dark purple squares) or the protein before (purple circles) and after (light purple triangles) incubation with NADPH. Inset shows the maximum absorption of PcxL at 383 nm and 448 nm. Purified flavin from washed PcxL shows absorption maxima at 377 nm and 450 nm. (H) Control reactions showing FAD absorption (red circles), NADPH absorption (dark red squares), and a mixture of pure FAD and NADPH (pink triangles). The inset shows the absorption maxima of FAD at 377 nm and 450 nm. The elevated baseline in the spectra shown in (F) and (G) are likely due to light scattering from small amounts of protein precipitation of HpxL and PcxL, as baseline elevation is not observed with the purified flavin that was washed from the proteins. We have observed that HpxL and PcxL are not stable for an extended period of time in solution at room temperature.

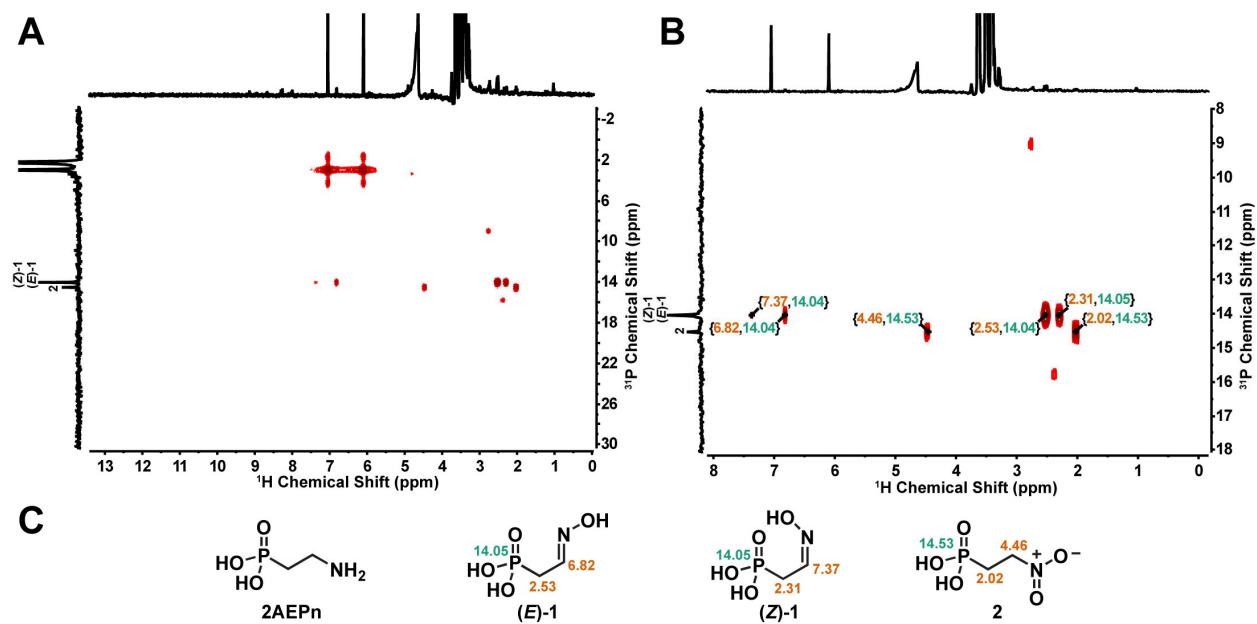

**Figure S3.** HMBC NMR analysis of HpxL incubated in the presence of FAD, NADPH, and 2AEPn for 16 hours. (A)  $^1\text{H}$ - $^{31}\text{P}$  HMBC spectrum of the HpxL reaction with 2AEPn as the substrate showing all phosphorus-containing molecules in the reaction. (B) Magnified region of the  $^1\text{H}$ - $^{31}\text{P}$  spectrum with key proton-phosphorus correlations labeled ( $^1\text{H}$  chemical shift,  $^{31}\text{P}$  chemical shift). (C) Compounds identified using  $^1\text{H}$ - $^{31}\text{P}$  correlations with the  $^1\text{H}$  chemical shifts displayed in orange and  $^{31}\text{P}$  chemical shift in green. 2AEPn, (*E*)- and (*Z*)-**1**, and **2** are shown. Substrates and cofactors were added at the following concentrations: 100  $\mu\text{M}$  FAD, 500  $\mu\text{M}$  NADPH, 3 mM 2AEPn, and 25  $\mu\text{M}$  HpxL. 25 mM phosphite and 10  $\mu\text{M}$  PTDH17x were also included as a cofactor regenerating system.

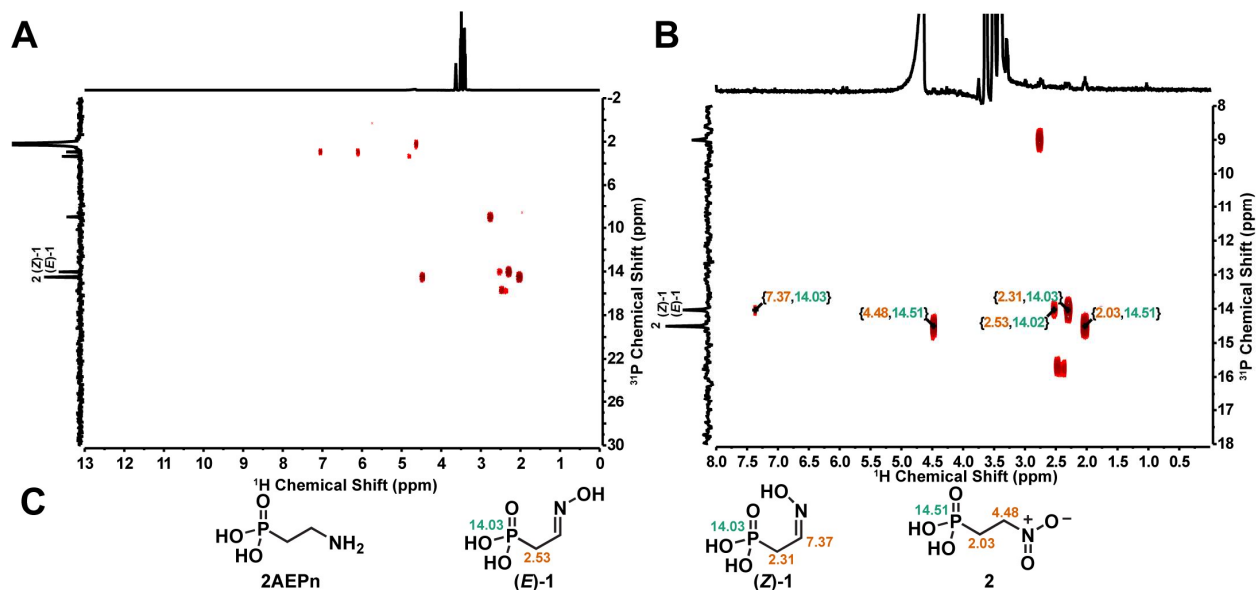

**Figure S4.** HMBC NMR analysis of PcxL incubated in the presence of FAD, NADPH, and 2AEPn for 16 hours. (A)  $^1\text{H}$ - $^{31}\text{P}$  HMBC NMR spectra of the PcxL reaction with 2AEPn as the substrate showing all phosphorus-containing molecules in the reaction. (B) Magnified region of the  $^1\text{H}$ - $^{31}\text{P}$  spectrum with key proton-phosphorus correlations labeled ( $^1\text{H}$  chemical shift,  $^{31}\text{P}$  chemical shift). (C) Compounds identified using  $^1\text{H}$ - $^{31}\text{P}$  correlations with the  $^1\text{H}$  chemical shifts displayed in orange and  $^{31}\text{P}$  chemical shift in green. 2AEPn, (E)- and (Z)-1 and 2 are shown. Substrates and cofactors were added at the following concentrations: 100  $\mu\text{M}$  FAD, 500  $\mu\text{M}$  NADPH, 3 mM 2AEPn, and 25  $\mu\text{M}$  PcxL. 25 mM phosphite and 10  $\mu\text{M}$  PTDH17x were also added as a cofactor regenerating system.

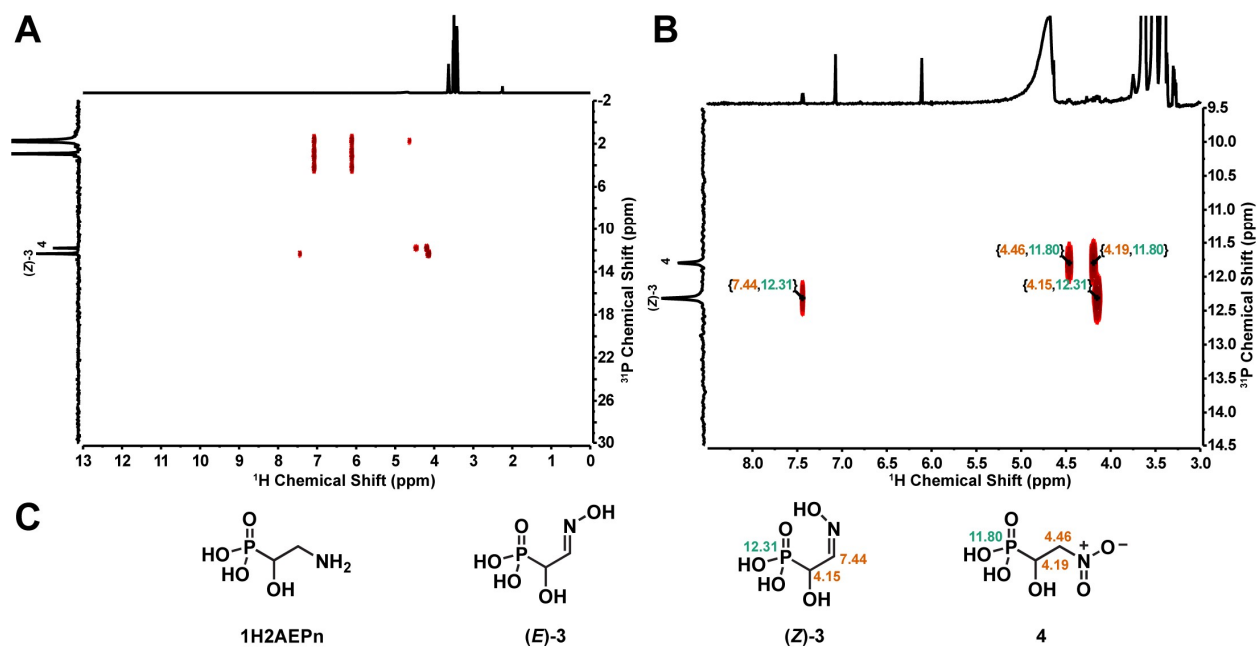

**Figure S5.** HMBC NMR analysis of HpxL incubated in the presence of FAD, NADPH, and (*S*)-1H2AEPn for 16 hours. (A) <sup>1</sup>H-<sup>31</sup>P HMBC NMR spectra of the HpxL reaction with (*S*)-1H2AEPn as the substrate showing all phosphorus-containing molecules in the reaction. (B) Magnified region of the <sup>1</sup>H-<sup>31</sup>P spectrum with key proton-phosphorus correlations labeled (<sup>1</sup>H chemical shift, <sup>31</sup>P chemical shift}). (C) Compounds identified using <sup>1</sup>H-<sup>31</sup>P correlations with the <sup>1</sup>H chemical shifts displayed in orange and <sup>31</sup>P chemical shift in green. 1H2AEPn, (*E*)- and (*Z*)-**3** and **4** are shown. Substrates and cofactors were added at the following concentrations: 100 μM FAD, 500 μM NADPH, 3 mM (*S*)-1H2AEPn, and 25 μM HpxL. 25 mM phosphite and 10 μM PTDH17x were also as a cofactor regenerating system.

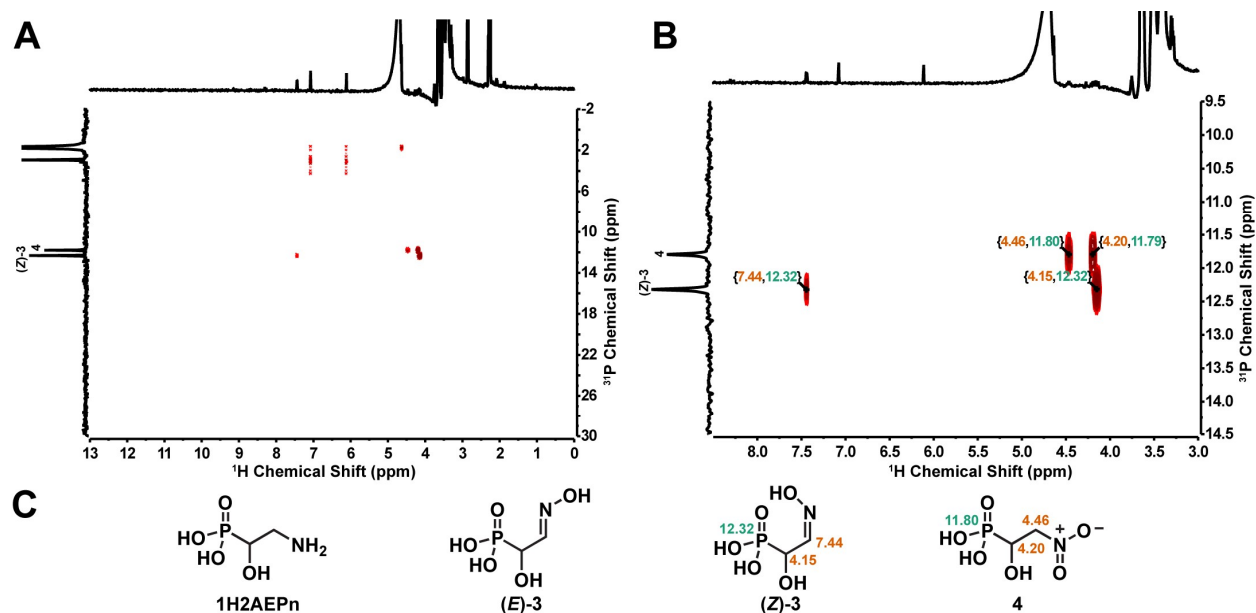

**Figure S6.** PcxL was incubated in the presence of FAD, NADPH, and (*S*)-1H2AEPn for 16 hours. (A)  $^1\text{H}$ - $^{31}\text{P}$  HMBC NMR spectra of the HpxL reaction with (*S*)-1H2AEPn as the substrate showing all phosphorus-containing molecules in the reaction. (B) Magnified region of the  $^1\text{H}$ - $^{31}\text{P}$  spectrum with key proton-phosphorus correlations labeled ( $\{^1\text{H}$  chemical shift,  $^{31}\text{P}$  chemical shift $\}$ ). (C) Compounds identified using  $^1\text{H}$ - $^{31}\text{P}$  correlations with the  $^1\text{H}$  chemical shifts displayed in orange and  $^{31}\text{P}$  chemical shift in green. (*S*)-1H2AEPn, (*E*)- and (*Z*)-**3** and **4** are shown. Substrates and cofactors were added at the following concentrations: 100  $\mu\text{M}$  FAD, 500  $\mu\text{M}$  NADPH, 3 mM (*S*)-1H2AEPn, and 25  $\mu\text{M}$  PcxL. 25 mM phosphite and 10  $\mu\text{M}$  PTDH17x were also as a cofactor regenerating system.
